# Supplementary material
Source: PubMed Central journal article supplement (PMC6278982)
Supplement: 2017_175414-Disclosures_and_Contributions.pdf [file 2017_175414-Disclosures_and_Contributions.pdf]

Haematologica  
HAEMATOL/2017/175414  
Version 4

A reversible carnitine palmitoyltransferase I (CPT1) inhibitor offsets  
chronic lymphocytic leukemia cell proliferation

Elena Gugiatti, Claudya Tenca, Silvia Ravera, Marina Fabbi, Fabio Ghiotto, Andrea N. Mazzarello, Davide Bagnara, Daniele Reverberi, Daniela Zarcone, Giovanna Cutrona, Adalberto Ibatici, Ermanno Ciccone, Zbigniew Darzynkiewicz, Franco Fais, and Silvia Bruno

Disclosures: None

Contributions: Gugiatti E. performed CLL cell cultures and drug treatments, and carried out most experiments, Tenca C. performed IG H and L chain V region sequencing, Ravera S. performed metabolic studies, Fabbi M. performed western blots, Ghiotto F. analyzed and interpreted data and participated in manuscript organization, Mazzarello A.N. , Zarcone D. and Bagnara D. collected and analyzed data, Reverberi D. performed B cell purification and sorting, Ibatici A. provided CLL cell samples, Cutrona G., Ciccone E. and Darzynkiewicz Z. provided valuable know-how and discussions, Fais F. and Bruno S. designed and supervised research, analyzed and interpreted data, performed statistical analysis and wrote the manuscript.
